# Supplementary material
Source: publisher figshare collection journal article supplement (https://acs.figshare.com/ndownloader/files/23529378)
Supplement: Supplementary file 1 [file 23529378]

## Supporting Information

### Two-Dimensional Co-Compounded Carbonaceous Nanoplates for Rubber Tire Composites with Enhanced Mechanical Properties

Hyelynn Song<sup>†</sup>, June-Young Chung<sup>‡</sup>, Taewoo Kim<sup>||</sup>, Junho Lee<sup>†</sup>, Hakjun Lee<sup>†</sup>, Jae-Do Nam, Hong H. Lee<sup>\*,†</sup> and Yong Hyup Kim<sup>\*,†</sup>

<sup>†</sup>School of Mechanical and Aerospace Engineering, Seoul National University, Seoul, Republic of Korea

<sup>‡</sup>Department of Polymer Science and Engineering, Sungkyunkwan University, Suwon, Republic of Korea

<sup>||</sup>Department of Mechanical Engineering, Incheon National University, Incheon, Republic of Korea

<sup>†</sup>School of Chemical and Biological Engineering, Seoul National University, Seoul, Republic of Korea

#### Corresponding Author

\* [honghlee@snu.ac.kr](mailto:honghlee@snu.ac.kr), [yongkim@snu.ac.kr](mailto:yongkim@snu.ac.kr)

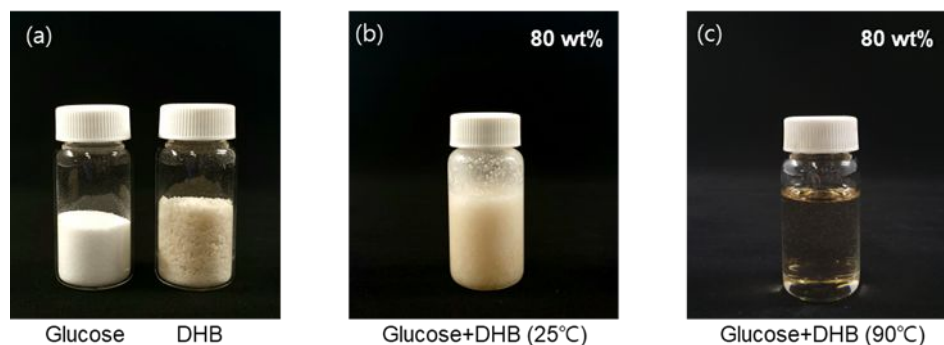

Figure S1. (a) Raw materials of glucose and DHB (b) Glucose + DHB solution dispersed at 80 wt% at room temperature, and (c) 80 wt% glucose + DHB solution heated in a water bath (90°C)

**Table S1.** There have been several attempts to synthesize carbonaceous materials using only glucose through hydrothermal treatment [1-8]. However, when glucose is used as single precursor material, it was confirmed that carbon spheres were synthesized. To synthesize a two-dimensional material with glucose, a mixture of glucose and graphene oxide (graphene oxide used as a frame material) was used. However, our group firstly reported a method of synthesizing two-dimensional carbonaceous nanoplates using only glucose in 2019 [9].

| Ref. No | Precursor source | Method       | Temp.     | Synthesized Material | Dimension                           | C/O ratio | Images                                                                                |
|---------|------------------|--------------|-----------|----------------------|-------------------------------------|-----------|---------------------------------------------------------------------------------------|
| 1       | Glucose          | Hydrothermal | 180°C     | Carbon sphere        | ~1 $\mu\text{m}$                    | 1.8       | 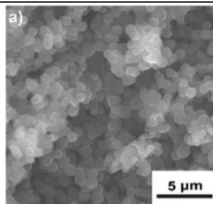   |
|         | Glucose+GO       | Hydrothermal | 180°C     | Carbon nanosheet     | t : 40 nm<br>L : 4 $\mu\text{m}$    | 4.5       |   |
| 2       | Glucose          | Hydrothermal | 200°C     | Carbon sphere        | ~ 500 nm                            | -         |  |
| 3       | Glucose          | Hydrothermal | 160-220°C | Carbon nanosheet     | t : 25 nm<br>L : ~100 $\mu\text{m}$ | 2.8       |  |
| 4       | Glucose          | Hydrothermal | 180°C     | Carbon sphere        | ~500 nm                             | -         |  |
| 5       | Glucose          | Hydrothermal | 180°C     | Carbon sphere        | ~ 500 nm                            | 1.75      |  |

|   |                |              |           |                  |                          |           |                                                                                      |
|---|----------------|--------------|-----------|------------------|--------------------------|-----------|--------------------------------------------------------------------------------------|
|   | Glucose+GO     | Hydrothermal | 180°C     | Carbon nanosheet | -                        | 3.46      | 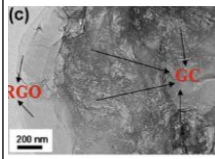  |
| 6 | Glucose        | Hydrothermal | 180-290°C | Carbon sphere    | 400-1200 nm              | 2.13-3.38 |   |
| 7 | Glucose        | Hydrothermal | 170-240°C | Carbon sphere    | 300-1300 nm              | 2.80-2.96 |   |
| 8 | Glucose        | Hydrothermal | 160-180°C | Carbon sphere    | 150-1500 nm              | -         |   |
| 9 | Glucose (CANP) | Hydrothermal | 210°C     | Carbon nanosheet | t : 1.3 nm<br>L : 725 nm | -         |  |

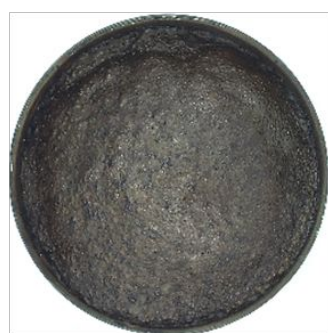

(a) Glucose only

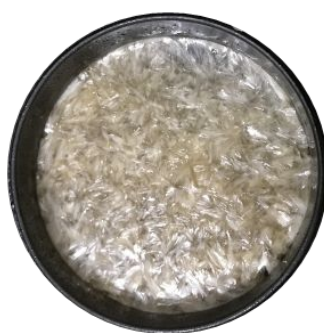

(b) DHB only

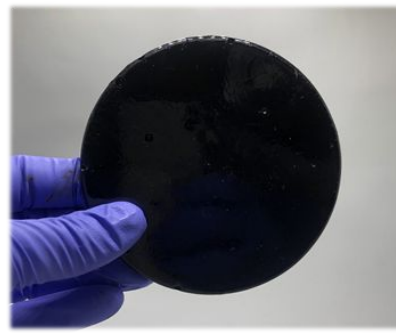

(c) Glucose+DHB (Co-CANP)

**Figure S2.** Results of hydrothermal process using (a) glucose only (b) DHB only, and (c) mixture of glucose and DHB (We call this Co-CANP in this paper). All the samples are prepared using the same amounts of source materials (80 wt%).

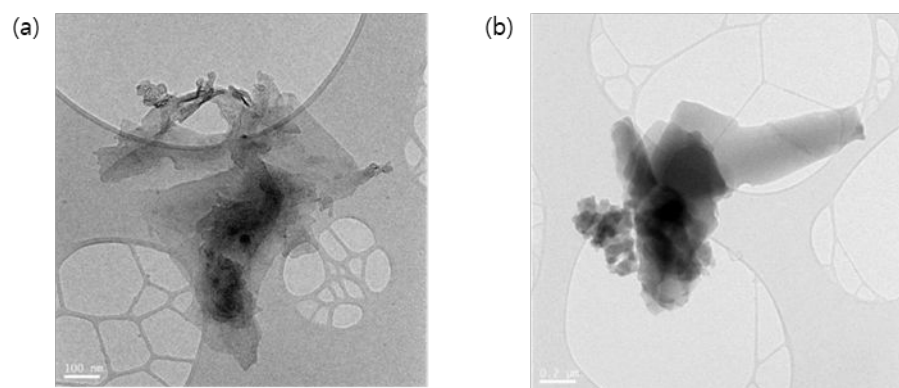

**Figure S3.** TEM images showing a two-dimensional Co-CANP layered in multiple layers.

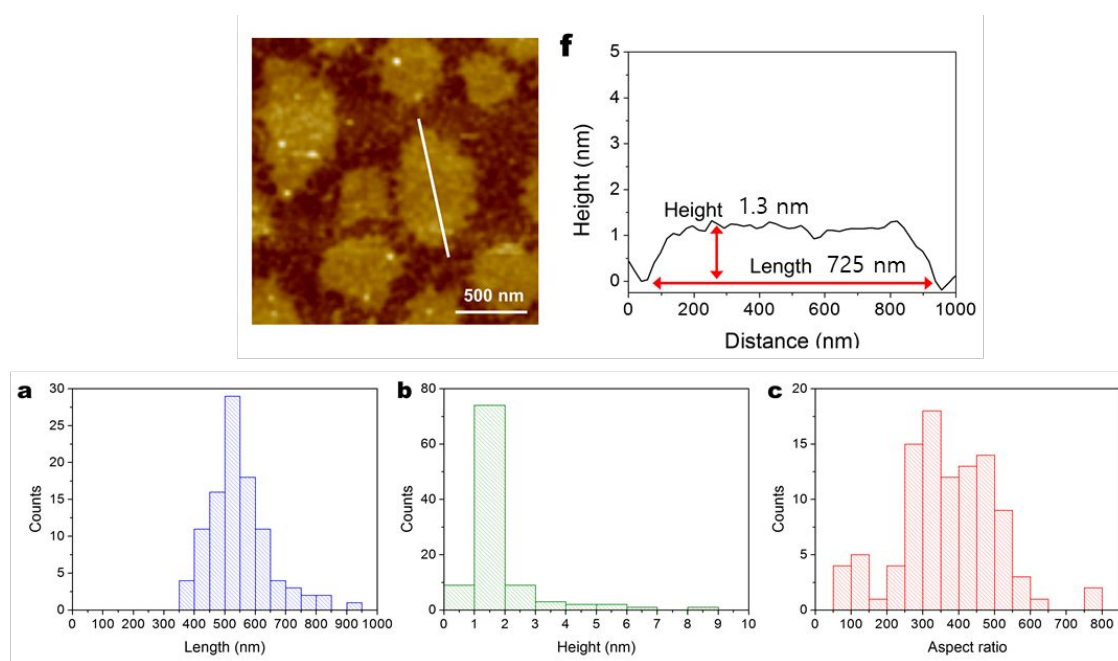

**Figure S4.** Morphological characteristics of CANP (synthesized using glucose only). The average height is 1.3 nm and the average length is 380 nm, with an average aspect ratio of 292.3 [9].

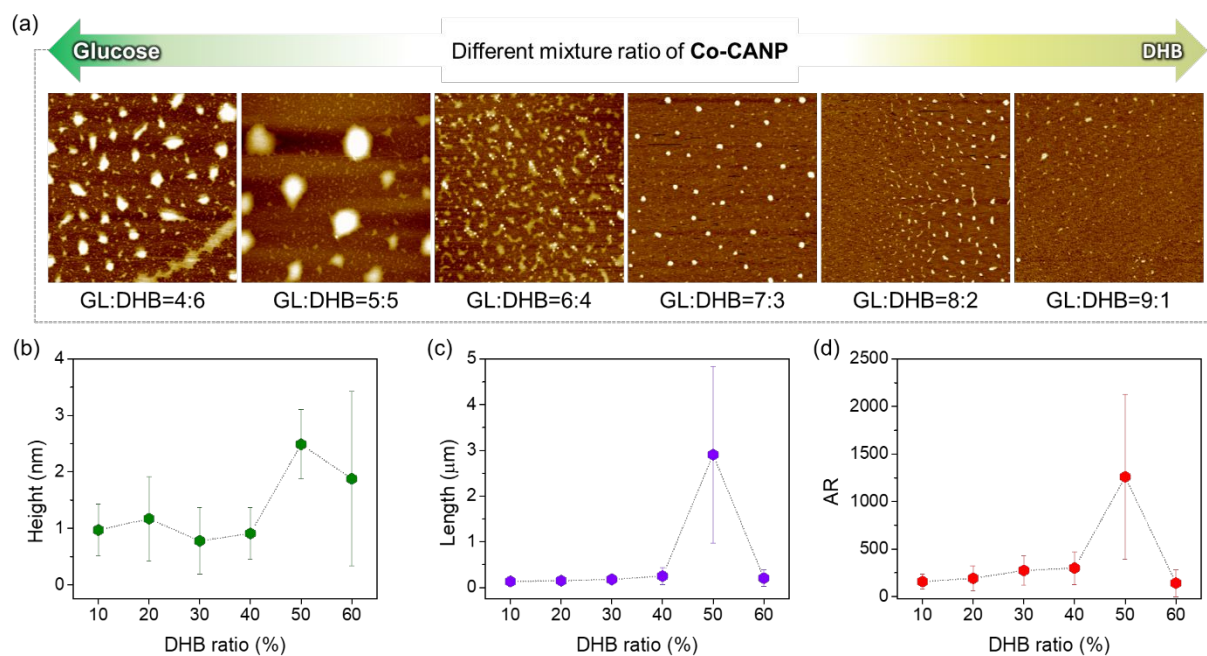

**Figure S5.** a) 5  $\mu\text{m}$  scan-size images of AFM for Co-CANP for various mixing ratios of glucose to DHB. b-d) Changes in height, length, and aspect ratio of Co-CANP as affected by the DHB mixing ratio.

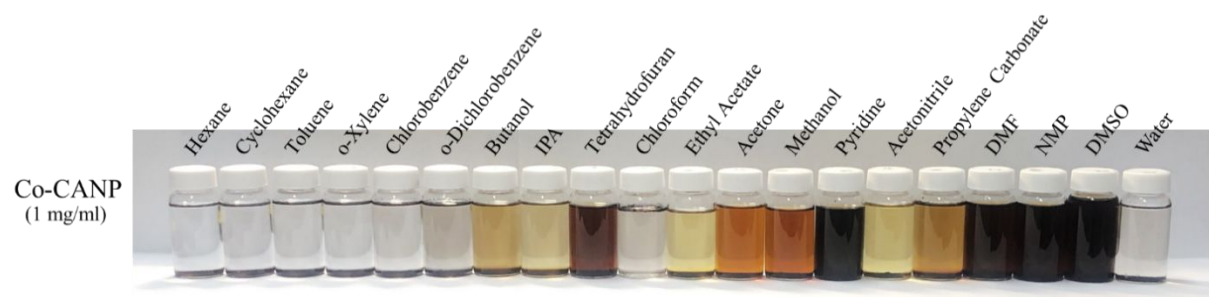

**Figure S6.** Dissolving 1mg/ml of Co-CANP in 20 kinds of organic solvents (more polar to the right side)

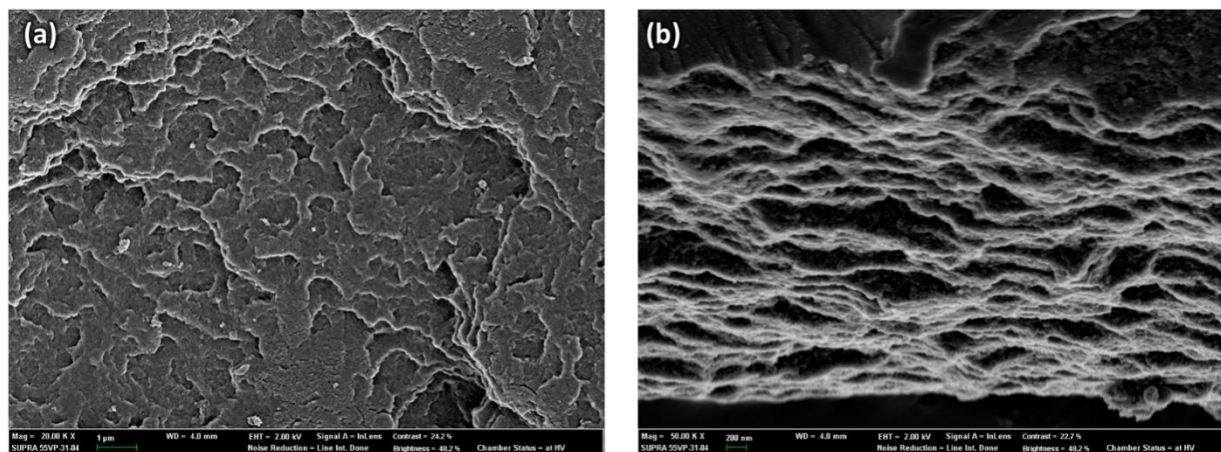

**Figure S7.** SEM images of the bucky paper obtained by vacuum filtration of Co-CANP dispersed in DMF: (a) top view (b) side view

**Table S2.** Chemical composition of co-compounded carbonaceous nanoplates obtained from elemental analysis

| Sample     | C (wt%) | H (wt%) | N (wt%) | Calculated O (wt%) |
|------------|---------|---------|---------|--------------------|
| GL:DHB=9:1 | 65.2954 | 4.5532  | 0       | 30.1514            |
| GL:DHB=8:2 | 65.0264 | 4.3315  | 0       | 30.6421            |
| GL:DHB=7:3 | 66.7233 | 4.3895  | 0       | 28.8872            |
| GL:DHB=6:4 | 73.6192 | 4.9716  | 0       | 21.4092            |
| GL:DHB=5:5 | 67.3511 | 4.6912  | 0       | 27.9577            |
| GL:DHB=4:6 | 66.9195 | 4.9317  | 0       | 28.1488            |

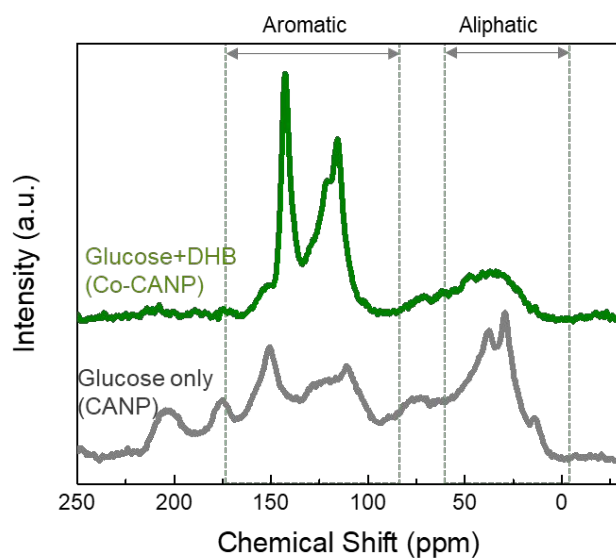

**Figure S8.** NMR data of Glucose only (CANP) and Glucose+DHB (Co-CANP) are shown. Co-CANP has more sharp peaks in the aromatic region compared to CANP, and more broad lower peaks in aliphatic region. It means Co-CANP has more graphitic structure than CANP.

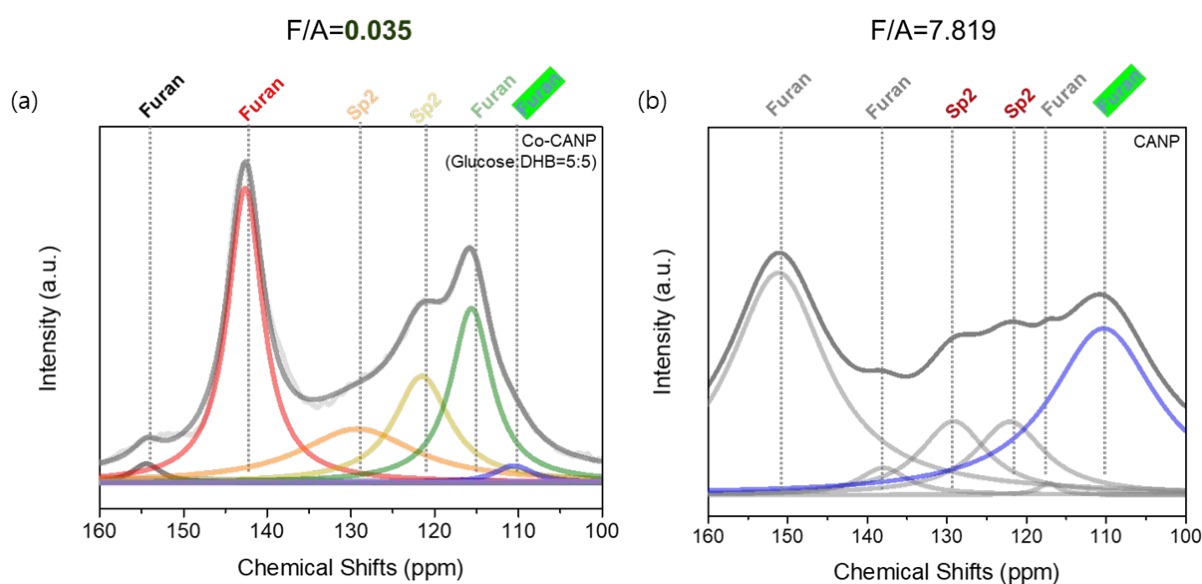

**Figure S9.** Deconvoluted NMR data of (a) Co-CANP and (b) CANP are shown. Furan to Arene ratio (F/A) are calculated through deconvoluted NMR data. The F/A ratio is 0.035 for co-CANP while it is 7.82 for CANP. This result suggests that Co-CANP has more arene structure than CANP.

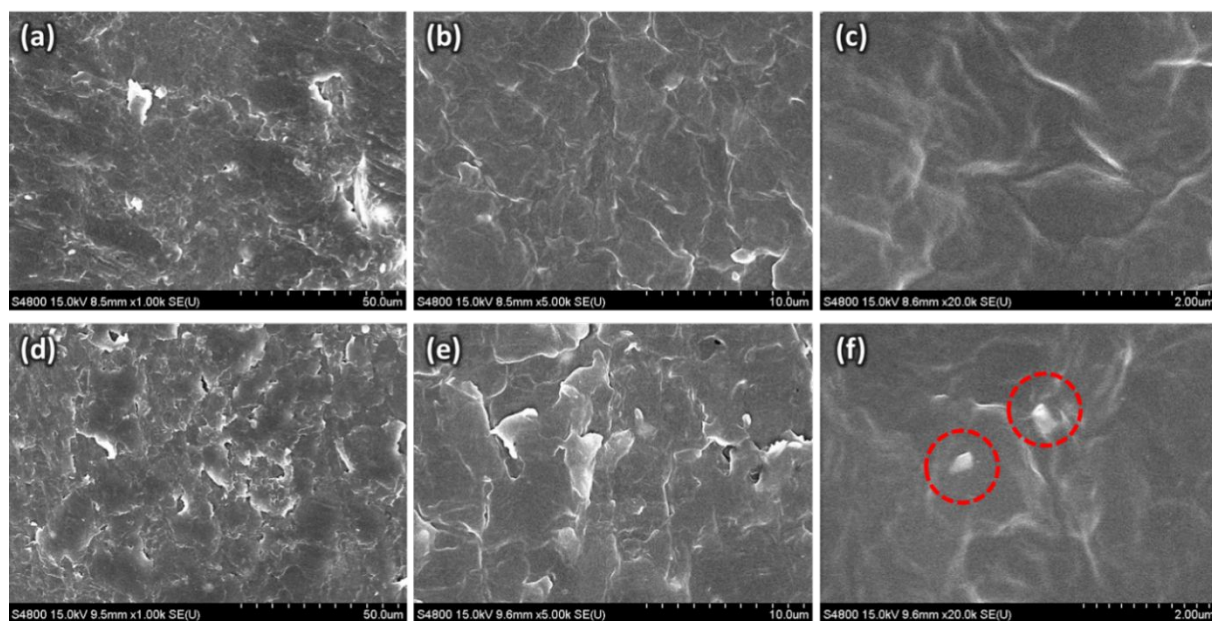

**Figure S10.** SEM images of S-SBR composites (a-c) composites without fillers (d-f) composites with 0.5 wt% of Co-CANPs as fillers. Red circles are indication of Co-CANPs.

## Supporting Information References

1. Krishnan, D.; Raidongia, K.; Shao, J.; Huang, J., Graphene oxide assisted hydrothermal carbonization of carbon hydrates. *ACS Nano* 2014, 8 (1), 449-57.
2. Adel, M.; El-Maghraby, A.; El-Shazly, O.; El-Wahidy, E. W. F.; & Mohamed, M. A., Synthesis of few-layer graphene-like nanosheets from glucose: New facile approach for graphene-like nanosheets large-scale production. *Journal of Materials Research*, 2016, 31(4), 455-467.
3. Tang, L.; Li, X.; Ji, R.; Teng, K.; Tai, G.; Ye, J.; Wei, C.; Lau, S., Bottom-up synthesis of large-scale graphene oxide nanosheets. *Journal of Materials Chemistry*, 2012, 22(12), 5676-5683.
4. Zhao, J.; Zhou, C.; He, C.; Dai, Y.; Jia, X.; Yang, Y., Efficient dehydration of fructose to 5-hydroxymethylfurfural over sulfonated carbon sphere solid acid catalysts. *Catalysis Today*, 2016, 264, 123-130.
4. Sun, J.; Teng, X.; Yang, J.; Bi, H., One pot synthesis of a highly water-dispersible hybrid glucose carbides and reduced graphene oxide material with superior electrical capacitance, *Journal of materials science*, 2013, 48(23), 8277-8286.
5. Li, M.; Li, W.; Liu, S., Control of the morphology and chemical properties of carbon spheres prepared from glucose by a hydrothermal method. *Journal of Materials Research*, 2012, 27(8), 1117-1123.
6. Sevilla, M.; Fuertes, AB., Chemical and structural properties of carbonaceous products obtained by hydrothermal carbonization of saccharides. *Chemistry—A European Journal*, 2009, 15(16), 4195-4203.
7. Xiaoming, S.; Li, Y., Colloidal carbon spheres and their core/shell structures with noble-metal nanoparticles. *Angewandte Chemie International Edition*, 2004, 43(5), 597-601.
8. Kim, T.; Lee, J.; Lee, G.; Lee, J.; Song, H.; Jho JY.; Lee, HH.; Kim, YH., Synthesis of a Carbonaceous Two-Dimensional Material, *ACS applied materials & interfaces*, 2019, 11(24), 21308-21313.
